# Supplementary material for: Rare, epilepsy-related disorder including intellectual disability – A scoping review of caregivers’ identified information needs
Source: PubMed Central journal article supplement (PMC9442773; doi:10.1177/17446295211002348), 2021-05-17
Supplement: sj-pdf-1-jld-10.1177_17446295211002348.pdf [file sj-pdf-1-jld-10.1177_17446295211002348.pdf]

# Documentation of literature search

---

Documentation on the literature search for *Caregivers (professional/family/unformal) need for health information in order to take care of persons with rare, epileptic conditions, including intellectual disability.*

The following databases were searched:

| Database                                   | Number of retrieved references |
|--------------------------------------------|--------------------------------|
| Medline (Ovid):                            | 877                            |
| PsycInfo (Ovid):                           | 2644                           |
| Embase (Ovid):                             | 396                            |
| CINAHL (Ebsco):                            | 1604                           |
| Cochrane Library:                          | 129                            |
|                                            |                                |
| Number of references before deduplication: | 5650                           |
| Number of references after deduplication:  | 4436                           |

## Some comments:

All references are reviewed and duplicates are removed, though some may have been missed. In cases of references to Cochrane Systematic Reviews with same title and CD-number, the oldest are deleted as it is withdrawn.

In cases of references with the same title and authors, but different journals, these are not removed even though they often are duplicate publications (same article in different journals), or they are a conference contributions and the published article.

Titles within [square brackets] = article in a non-English language.

## EndNote

References are imported to an EndNote Library named:  
Rare epileptic diagnosis information\_aug19.enl

To save the EndNote Library:

Double click the EndNote file, it opens and can be saved to your computer. Click File -> Save as, and save to your computer.

### Search syntax:

#### Ovid-databases:

/ After an index term indicates a subject heading were selected.

.tw. Indicates a search for a term in title or abstract

.kw. = keyword heading

.kf. = keyword heading word

\* At the end of a term indicates that this term has been truncated.

Adj3 Indicates a search for two terms next to each other, in any order, up to 3 words in between.

#### CINAHL/ EBSCO

MH Search for subject heading

TI Search for word in title

AB Search for word in abstract

\* At the end of a term indicates that this term has been truncated.

N3 Indicates a search for two terms next to each other, in any order, up to 3 words in between.

#### Cochrane library

ti,ab,kw Indicates search for word in title, abstract or keyword

NEAR/3 Indicates a search for two terms next to each other, in any order, up to 3 words in between.

The Medline search is structured as follows (searches in other databases are adapted from this):

| Topic                                                | Search line |
|------------------------------------------------------|-------------|
| <b>Patients:</b>                                     |             |
| Epilepsy with intellectual disabilities              | 1-4         |
| Specific epilepsy diagnoses                          | 5-18        |
| All Patients                                         | 20          |
| Families and next of kin                             | 21-24       |
| Caregivers or health staff at residential facilities | 25          |
| All families and health staff                        | 26          |
| Experiences, Information, knowledge etc              | 27-34       |
| Patients, families and information                   | 35          |

Search is not limited by year, language or research design.

### Embase, Medline and PsycInfo

Embase Classic+Embase 1947 to 2019 August 14,

Ovid MEDLINE(R) ALL 1946 to August 14, 2019,

PsycINFO 1806 to August Week 2 2019

Date of search: August 16, 2019

Results: Medline 877, EMBASE 2644, PsycInfo 396.

|    |                                                                                                                                                           |        |
|----|-----------------------------------------------------------------------------------------------------------------------------------------------------------|--------|
| 1  | exp Epilepsy/                                                                                                                                             | 381663 |
| 2  | (epilep* or seizure* or convulsion*).tw,kw,kf.                                                                                                            | 560696 |
| 3  | Intellectual Disability/ or ((mental or Intellectual or cognitive) and (disabilit* or retardation or Deficiencies or Deficiency or impairment)).tw,kw,kf. | 531859 |
| 4  | (1 or 2) and 3                                                                                                                                            | 38784  |
| 5  | Dravet syndrome.tw,kw,kf.                                                                                                                                 | 2502   |
| 6  | (GLUT1 deficiency syndrome or glucose transporter type 1 deficiency syndrome).tw,kw,kf.                                                                   | 526    |
| 7  | Lafora Disease/ or lafora.tw,kw,kf.                                                                                                                       | 7033   |
| 8  | TSC1.tw,kw,kf.                                                                                                                                            | 4554   |
| 9  | TSC2.tw,kw,kf.                                                                                                                                            | 5773   |
| 10 | Landau-Kleffner Syndrome/ or Landau Kleffner.tw,kw,kf.                                                                                                    | 1735   |
| 11 | Lennox Gastaut Syndrome/ or Lennox Gastaut.tw,kw,kf.                                                                                                      | 5728   |
| 12 | exp Epilepsies, Myoclonic/                                                                                                                                | 11129  |
| 13 | (myoclonic epilep* or myoclonic encephalopath*).tw,kw,kf.                                                                                                 | 7878   |

|    |                                                                                                                                                                                                                                                                                                                 |          |
|----|-----------------------------------------------------------------------------------------------------------------------------------------------------------------------------------------------------------------------------------------------------------------------------------------------------------------|----------|
| 14 | Unverricht-Lundborg Syndrome/ or unverricht-lundborg.tw,kw,kf.                                                                                                                                                                                                                                                  | 6991     |
| 15 | Sturge-Weber Syndrome/ or Sturge Weber.tw,kw,kf.                                                                                                                                                                                                                                                                | 4795     |
| 16 | Ohtahara.tw,kw,kf.                                                                                                                                                                                                                                                                                              | 605      |
| 17 | Aicardi Syndrome/ or Aicardi.tw,kw,kf.                                                                                                                                                                                                                                                                          | 2008     |
| 18 | GRIN1.tw,kw,kf.                                                                                                                                                                                                                                                                                                 | 593      |
| 19 | or/4-18                                                                                                                                                                                                                                                                                                         | 73127    |
| 20 | exp Family/                                                                                                                                                                                                                                                                                                     | 1127632  |
| 21 | "Child of Impaired Parents"/                                                                                                                                                                                                                                                                                    | 5407     |
| 22 | Caregivers/                                                                                                                                                                                                                                                                                                     | 111760   |
| 23 | (parent* or mother* or father* or daughter* or son* or sibling* or sister* or brother* or wife* or spouse* or husband* or partner* or meaningful person* or family member* or stepfamil* or next-of-kin or kinship or relatives or caregiver* or carer or carers or dependent* or significant others).tw,kw,kf. | 6410063  |
| 24 | (exp Health Personnel/ or (staff or nurse or nurses or Personnel).tw,kw,kf.) and (exp Residential Facilities/ or Community Health Services/ or (Community Health Service* or home or homes or Residential Facilit* or living facilit*).tw,kw,kf.)                                                               | 158860   |
| 25 | or/20-24                                                                                                                                                                                                                                                                                                        | 6901826  |
| 26 | Life Change Events/                                                                                                                                                                                                                                                                                             | 48177    |
| 27 | (life adj3 (experience or events or event or transition or transitions or transitional or change or changes)).tw,kw,kf.                                                                                                                                                                                         | 113599   |
| 28 | quality of life/ or (life adj3 quality).tw,kw,kf.                                                                                                                                                                                                                                                               | 936606   |
| 29 | ((self adj3 (management or managing)) or adherence or compliance or coping or resilience).tw,kw,kf.                                                                                                                                                                                                             | 897184   |
| 30 | (knowledge or information or education or experience).tw.                                                                                                                                                                                                                                                       | 7081244  |
| 31 | knowledge/                                                                                                                                                                                                                                                                                                      | 46794    |
| 32 | (need or needs).tw,kw,kf.                                                                                                                                                                                                                                                                                       | 3013033  |
| 33 | or/26-32                                                                                                                                                                                                                                                                                                        | 10502693 |

|    |                                                                                                                                                                                                                                                                                                           |         |
|----|-----------------------------------------------------------------------------------------------------------------------------------------------------------------------------------------------------------------------------------------------------------------------------------------------------------|---------|
| 34 | 19 and 25 and 33                                                                                                                                                                                                                                                                                          | 3049    |
| 35 | exp epilepsy/                                                                                                                                                                                                                                                                                             | 381663  |
| 36 | exp seizures/                                                                                                                                                                                                                                                                                             | 228870  |
| 37 | (epilep* or seizure* or convulsion*).tw.                                                                                                                                                                                                                                                                  | 551612  |
| 38 | exp Intellectual Development Disorder/ or exp Cognitive Impairment/ or ((mental or Intellectual or cognitive) and (Disability or retardation or Deficiencies or Deficiency or cognitive impairment)).tw.                                                                                                  | 872194  |
| 39 | (35 or 36 or 37) and 38                                                                                                                                                                                                                                                                                   | 60038   |
| 40 | lennox gastaut syndrome/                                                                                                                                                                                                                                                                                  | 4026    |
| 41 | (Dravet syndrome or TSC1 or TSC2 or Landau Kleffner or Lennox Gastaut or myoclonic encephalopath* or Sturge Weber or Ohtahara or Aicardi or GRIN1 or (GLUT1 deficiency syndrome or glucose transporter type 1 deficiency syndrome) or lafora or unverricht-lundborg).tw.                                  | 23679   |
| 42 | or/39-41                                                                                                                                                                                                                                                                                                  | 82448   |
| 43 | exp Family/                                                                                                                                                                                                                                                                                               | 1127632 |
| 44 | exp parents/                                                                                                                                                                                                                                                                                              | 490170  |
| 45 | exp parenting/                                                                                                                                                                                                                                                                                            | 207022  |
| 46 | caregivers/                                                                                                                                                                                                                                                                                               | 111760  |
| 47 | (parent* or mother* or father* or daughter* or son* or sibling* or sister* or brother* or wife* or spouse* or husband* or partner* or meaningful person* or family member* or stepfamil* or next-of-kin or kinship or relatives or caregiver* or carer or carers or dependent* or significant others).tw. | 6384425 |
| 48 | (exp health personnel/ or home care personnel/ or (staff or nurse or nurses or Personnel).tw.) and (exp residential care institutions/ or Community Health Services/ or (Community Health Service* or home or homes or Residential Facilit* or living facilit*).tw.)                                      | 161771  |
| 49 | or/43-48                                                                                                                                                                                                                                                                                                  | 6880984 |
| 50 | (life adj3 (experience or events or event or transition or transitions or transitional or change or changes)).tw.                                                                                                                                                                                         | 112701  |

|    |                                                                                                                            |          |
|----|----------------------------------------------------------------------------------------------------------------------------|----------|
| 51 | ((self adj3 (management or managing)) or adherence or compliance or coping or resilience).tw.                              | 883991   |
| 52 | (life adj3 quality).tw.                                                                                                    | 742298   |
| 53 | exp life changes/                                                                                                          | 62090    |
| 54 | "quality of life"/ or exp life satisfaction/                                                                               | 671001   |
| 55 | (knowledge or information or education or experience).tw.                                                                  | 7081244  |
| 56 | information/ or "knowledge (general)"/                                                                                     | 32013    |
| 57 | (need or needs).tw.                                                                                                        | 3010484  |
| 58 | or/50-57                                                                                                                   | 10520647 |
| 59 | 42 and 49 and 58                                                                                                           | 3385     |
| 60 | exp epilepsy/ or "seizure, epilepsy and convulsion"/                                                                       | 381720   |
| 61 | (epilep* or seizure* or convulsion*).tw,kw.                                                                                | 560476   |
| 62 | intellectual disability.af.                                                                                                | 123801   |
| 63 | exp intellectual impairment/                                                                                               | 513082   |
| 64 | ((mental or Intellectual or cognitive) and (disabilit* or retardation or Deficiencies or Deficiency or impairment)).tw,kw. | 495269   |
| 65 | (60 or 61) and (62 or 63 or 64)                                                                                            | 60995    |
| 66 | severe myoclonic epilepsy in infancy/                                                                                      | 1597     |
| 67 | (GLUT1 deficiency syndrome or glucose transporter type 1 deficiency syndrome).tw,kw.                                       | 526      |
| 68 | myoclonus epilepsy/                                                                                                        | 9530     |
| 69 | lafora.tw,kw.                                                                                                              | 1472     |
| 70 | TSC1.tw,kw.                                                                                                                | 4543     |
| 71 | TSC2.tw,kw.                                                                                                                | 5762     |
| 72 | Landau Kleffner syndrome/                                                                                                  | 1142     |
| 73 | Landau Kleffner.tw,kw.                                                                                                     | 1336     |

|    |                                                                                                                                                                                                                                                                                                              |         |
|----|--------------------------------------------------------------------------------------------------------------------------------------------------------------------------------------------------------------------------------------------------------------------------------------------------------------|---------|
| 74 | Lennox Gastaut syndrome/                                                                                                                                                                                                                                                                                     | 4026    |
| 75 | Lennox Gastaut.tw,kw.                                                                                                                                                                                                                                                                                        | 3834    |
| 76 | (myoclonic epilep* or myoclonic encephalopath*).tw,kw.                                                                                                                                                                                                                                                       | 7827    |
| 77 | unverricht-lundborg.tw,kw.                                                                                                                                                                                                                                                                                   | 718     |
| 78 | Sturge Weber syndrome/                                                                                                                                                                                                                                                                                       | 3734    |
| 79 | Sturge Weber.tw,kw.                                                                                                                                                                                                                                                                                          | 3797    |
| 80 | ohtahara syndrome/                                                                                                                                                                                                                                                                                           | 342     |
| 81 | Ohtahara.tw,kw.                                                                                                                                                                                                                                                                                              | 597     |
| 82 | Aicardi syndrome/                                                                                                                                                                                                                                                                                            | 544     |
| 83 | Aicardi.tw,kw.                                                                                                                                                                                                                                                                                               | 1794    |
| 84 | GRIN1.tw,kw.                                                                                                                                                                                                                                                                                                 | 593     |
| 85 | or/65-84                                                                                                                                                                                                                                                                                                     | 92755   |
| 86 | exp family/                                                                                                                                                                                                                                                                                                  | 1127632 |
| 87 | exp "care and caring"/                                                                                                                                                                                                                                                                                       | 610418  |
| 88 | (parent* or mother* or father* or daughter* or son* or sibling* or sister* or brother* or wife* or spouse* or husband* or partner* or meaningful person* or family member* or stepfamil* or next-of-kin or kinship or relatives or caregiver* or carer or carers or dependent* or significant others).tw,kw. | 6404461 |
| 89 | (exp health care personnel/ or (staff or nurse or nurses or Personnel).tw,kw.) and (residential home/ or community care/ or (Community Health Service* or home or homes or Residential Facilit* or living facilit*).tw,kw.)                                                                                  | 131498  |
| 90 | or/86-89                                                                                                                                                                                                                                                                                                     | 7316473 |
| 91 | life event/                                                                                                                                                                                                                                                                                                  | 28437   |
| 92 | (life adj3 (experience or events or event or transition or transitions or transitional or change or changes)).tw,kw.                                                                                                                                                                                         | 113281  |
| 93 | exp "quality of life"/                                                                                                                                                                                                                                                                                       | 694980  |

|     |                                                                                                  |          |
|-----|--------------------------------------------------------------------------------------------------|----------|
| 94  | (life adj3 quality).tw,kw.                                                                       | 752630   |
| 95  | ((self adj3 (management or managing)) or adherence or compliance or coping or resilience).tw,kw. | 895120   |
| 96  | (knowledge or information or education or experience).tw.                                        | 7081244  |
| 97  | knowledge/ or information/                                                                       | 75083    |
| 98  | (need or needs).tw,kw.                                                                           | 3012317  |
| 99  | or/91-98                                                                                         | 10510248 |
| 100 | 85 and 90 and 99                                                                                 | 3986     |
| 101 | 34 use medall                                                                                    | 877      |
| 102 | 59 use psych                                                                                     | 396      |
| 103 | 100 use emczd                                                                                    | 2644     |
| 104 | 101 or 102 or 103                                                                                | 3917     |
| 105 | remove duplicates from 104                                                                       | 2999     |

### The Cochrane Library

Date of search: August 16 2019

Results: Total 129: Cochrane reviews 16, Trials 113

|    |                                                                                                                                 |       |
|----|---------------------------------------------------------------------------------------------------------------------------------|-------|
| #1 | MeSH descriptor: [Epilepsy] explode all trees                                                                                   | 2199  |
| #2 | ((epilep* or seizure* or convulsion*)):ti,ab,kw                                                                                 | 12494 |
| #3 | MeSH descriptor: [Intellectual Disability] explode all trees                                                                    | 1220  |
| #4 | ((((mental or Intellectual or cognitive) and (disabilit* or retardation or Deficiencies or Deficiency or impairment))):ti,ab,kw | 19206 |
| #5 | (#1 or #2) and (#3 OR #4)                                                                                                       | 708   |
| #6 | (Dravet syndrome.):ti,ab,kw                                                                                                     | 67    |



|     |                                                                                                                                                                                                                                                                                                                |        |
|-----|----------------------------------------------------------------------------------------------------------------------------------------------------------------------------------------------------------------------------------------------------------------------------------------------------------------|--------|
| #7  | ((GLUT1 deficiency syndrome or glucose transporter type 1 deficiency syndrome)):ti,ab,kw                                                                                                                                                                                                                       | 5      |
| #8  | MeSH descriptor: [Lafora Disease] explode all trees                                                                                                                                                                                                                                                            | 0      |
| #9  | (Lafora):ti,ab,kw                                                                                                                                                                                                                                                                                              | 4      |
| #10 | (TSC1 OR TSC2):ti,ab,kw                                                                                                                                                                                                                                                                                        | 35     |
| #11 | MeSH descriptor: [Landau-Kleffner Syndrome] explode all trees                                                                                                                                                                                                                                                  | 1      |
| #12 | (Landau Kleffner):ti,ab,kw                                                                                                                                                                                                                                                                                     | 9      |
| #13 | MeSH descriptor: [Lennox Gastaut Syndrome] explode all trees                                                                                                                                                                                                                                                   | 25     |
| #14 | (Lennox Gastaut):ti,ab,kw                                                                                                                                                                                                                                                                                      | 240    |
| #15 | MeSH descriptor: [Epilepsies, Myoclonic] explode all trees                                                                                                                                                                                                                                                     | 57     |
| #16 | ((myoclonic epilep* or myoclonic encephalopath*)):ti,ab,kw                                                                                                                                                                                                                                                     | 203    |
| #17 | [mh "Unverricht-Lundborg Syndrome"]                                                                                                                                                                                                                                                                            | 4      |
| #18 | (Unverricht-Lundborg):ti,ab,kw                                                                                                                                                                                                                                                                                 | 11     |
| #19 | [mh "Sturge-Weber Syndrome"] OR (Sturge-Weber):ti,ab,kw                                                                                                                                                                                                                                                        | 13     |
| #20 | Ohtahara:ti,ab,kw                                                                                                                                                                                                                                                                                              | 2      |
| #21 | [mh "Aicardi Syndrome"] or Aicardi:ti,ab,kw                                                                                                                                                                                                                                                                    | 2      |
| #22 | grin1:ti,ab,kw                                                                                                                                                                                                                                                                                                 | 3      |
| #23 | (Beauchamp et al.: -#22)                                                                                                                                                                                                                                                                                       | 1148   |
| #24 | [mh "Family"]                                                                                                                                                                                                                                                                                                  | 8514   |
| #25 | [mh "Caregivers"]                                                                                                                                                                                                                                                                                              | 1915   |
| #26 | (parent* or mother* or father* or daughter* or son* or sibling* or sister* or brother* or wife* or spouse* or husband* or partner* or meaningful person* or family member* or stepfamil* or next-of-kin or kinship or relatives or caregiver* or carer or carers or dependent* or significant others):ti,ab,kw | 150207 |
| #27 | ([mh "Health Personnel"] or (staff or nurse or nurses or Personnel):ti,ab,kw) and ([mh "Residential Facilities"] or [mh "Community                                                                                                                                                                             | 9936   |

|     |                                                                                                                          |        |
|-----|--------------------------------------------------------------------------------------------------------------------------|--------|
|     | Health Services"] or (Community Health Service* or home or homes or Residential Facilit* or living facilit*)):ti,ab,kw'  |        |
| #28 | (Beauchamp et al.: -#27)                                                                                                 | 157100 |
| #29 | [mh "Life Change Events"]                                                                                                | 454    |
| #30 | (life NEAR/3 (experience or events or event or transition or transitions or transitional or change or changes)):ti,ab,kw | 3754   |
| #31 | [mh "quality of life"] or (life NEAR/3 quality):ti,ab,kw                                                                 | 97070  |
| #32 | ((self NEAR/3 (management or managing)) or adherence or compliance or coping or resilience):ti,ab,kw                     | 72635  |
| #33 | (knowledge or information or education or experience):ti,ab,kw                                                           | 171499 |
| #34 | (need or needs):ti,ab,kw                                                                                                 | 79718  |
| #35 | (Larsen et al.: -#34)                                                                                                    | 342487 |
| #36 | #23 and #28 and #35                                                                                                      | 129    |

#### CINAHL EBSCO Host

Date of search: August 16 2019

Results: 1604

|    |                                                                                                                                                                                                                                                          |        |
|----|----------------------------------------------------------------------------------------------------------------------------------------------------------------------------------------------------------------------------------------------------------|--------|
| S1 | (MH "Epilepsy+")                                                                                                                                                                                                                                         | 14,990 |
| S2 | TI ( (epilep* or seizure* or convulsion* ) OR AB ( (epilep* or seizure* or convulsion* ) )                                                                                                                                                               | 26,315 |
| S3 | (MH "Intellectual Disability+")                                                                                                                                                                                                                          | 27,651 |
| S4 | TI ( ((mental or Intellectual or cognitive) and (disabilit* or retardation or Deficiencies or Deficiency or impairment)) ) OR AB ( ((mental or Intellectual or cognitive) and (disabilit* or retardation or Deficiencies or Deficiency or impairment)) ) | 51,934 |
| S5 | S1 OR S2                                                                                                                                                                                                                                                 | 29,549 |
| S6 | S3 OR S4                                                                                                                                                                                                                                                 | 70,017 |

|     |                                                                                                                                                                                  |         |
|-----|----------------------------------------------------------------------------------------------------------------------------------------------------------------------------------|---------|
| S7  | S5 AND S6                                                                                                                                                                        | 2,018   |
| S8  | (MH "Dravet Syndrome")                                                                                                                                                           | 73      |
| S9  | TI Dravet syndrome OR AB Dravet syndrome                                                                                                                                         | 191     |
| S10 | TI ( ( GLUT1 deficiency syndrome or glucose transporter type 1 deficiency syndrome ) ) OR AB ( ( GLUT1 deficiency syndrome or glucose transporter type 1 deficiency syndrome ) ) | 43      |
| S11 | TI lafora OR AB lafora                                                                                                                                                           | 48      |
| S12 | TI ( TSC1 or TSC2 ) OR AB ( TSC1 or TSC2 )                                                                                                                                       | 196     |
| S13 | (MH "Landau-Kleffner Syndrome")                                                                                                                                                  | 16      |
| S14 | TI Landau Kleffner OR AB Landau Kleffner                                                                                                                                         | 52      |
| S15 | (MH "Lennox-Gastaut Syndrome")                                                                                                                                                   | 101     |
| S16 | TI lennox-gastaut OR AB Lennox Gastaut                                                                                                                                           | 173     |
| S17 | (MH "Epilepsies, Myoclonic+")                                                                                                                                                    | 234     |
| S18 | TI ( ( myoclonic epilep* or myoclonic encephalopath* ) ) OR AB ( ( myoclonic epilep* or myoclonic encephalopath* ) )                                                             | 386     |
| S19 | TI Unverricht-Lundborg OR AB Unverricht-Lundborg                                                                                                                                 | 24      |
| S20 | (MH "Sturge-Weber Syndrome")                                                                                                                                                     | 150     |
| S21 | TI Sturge-Weber OR AB Sturge-Weber                                                                                                                                               | 203     |
| S22 | TI Ohtahara OR AB Ohtahara                                                                                                                                                       | 35      |
| S23 | (MH "Aicardi Syndrome")                                                                                                                                                          | 17      |
| S24 | TI aicardi OR AB Aicardi                                                                                                                                                         | 92      |
| S25 | TI GRIN1 OR AB GRIN1                                                                                                                                                             | 15      |
| S26 | S2 OR S7 OR S8 OR S9 OR S10 OR S11 OR S12 OR S13 OR S14 OR S15 OR S16 OR S17 OR S18 OR S19 OR S20 OR S21 OR S22 OR S23 OR S24 OR S25                                             | 27,102  |
| S27 | (MH "Family+")                                                                                                                                                                   | 199,344 |
| S28 | (MH "Caregivers")                                                                                                                                                                | 30,717  |

|     |                                                                                                                                                                                                                                                                                                                                                                                                                                                                                                                                                                                                                              |         |
|-----|------------------------------------------------------------------------------------------------------------------------------------------------------------------------------------------------------------------------------------------------------------------------------------------------------------------------------------------------------------------------------------------------------------------------------------------------------------------------------------------------------------------------------------------------------------------------------------------------------------------------------|---------|
| S29 | TI ( (parent* or mother* or father* or daughter* or son* or sibling* or sister* or brother* or wife* or spouse* or husband* or partner* or meaningful person* or family member* or stepfamil* or next-of-kin or kinship or relatives or caregiver* or carer or carers or dependent* or significant others) ) OR AB ( (parent* or mother* or father* or daughter* or son* or sibling* or sister* or brother* or wife* or spouse* or husband* or partner* or meaningful person* or family member* or stepfamil* or next-of-kin or kinship or relatives or caregiver* or carer or carers or dependent* or significant others) ) | 531,908 |
| S30 | (MH "Health Personnel+")                                                                                                                                                                                                                                                                                                                                                                                                                                                                                                                                                                                                     | 492,168 |
| S31 | TI ( (staff or nurse or nurses or Personnel) ) OR AB ( (staff or nurse or nurses or Personnel) )                                                                                                                                                                                                                                                                                                                                                                                                                                                                                                                             | 371,005 |
| S32 | S30 OR S31                                                                                                                                                                                                                                                                                                                                                                                                                                                                                                                                                                                                                   | 736,275 |
| S33 | (MH "Residential Facilities+")                                                                                                                                                                                                                                                                                                                                                                                                                                                                                                                                                                                               | 28,516  |
| S34 | (MH "Community Health Services+")                                                                                                                                                                                                                                                                                                                                                                                                                                                                                                                                                                                            | 375,178 |
| S35 | TI ( (Community Health Service* or home or homes or Residential Facilit* or living facilit*) ) OR AB ( (Community Health Service* or home or homes or Residential Facilit* or living facilit*) )                                                                                                                                                                                                                                                                                                                                                                                                                             | 130,741 |
| S36 | S33 OR S34 OR S35                                                                                                                                                                                                                                                                                                                                                                                                                                                                                                                                                                                                            | 481,746 |
| S37 | S32 AND S36                                                                                                                                                                                                                                                                                                                                                                                                                                                                                                                                                                                                                  | 102,311 |
| S38 | S27 OR S28 OR S29 OR S37                                                                                                                                                                                                                                                                                                                                                                                                                                                                                                                                                                                                     | 707,118 |
| S39 | (MH "Life Change Events+")                                                                                                                                                                                                                                                                                                                                                                                                                                                                                                                                                                                                   | 43,088  |
| S40 | TI ( (life N3 (experience or events or event or transition or transitions or transitional or change or changes)) ) OR AB ( (life N3 (experience or events or event or transition or transitions or transitional or change or changes)) )                                                                                                                                                                                                                                                                                                                                                                                     | 18,865  |
| S41 | (MH "Quality of Life+")                                                                                                                                                                                                                                                                                                                                                                                                                                                                                                                                                                                                      | 103,214 |
| S42 | TI (quality N3 life) OR AB (quality N3 life)                                                                                                                                                                                                                                                                                                                                                                                                                                                                                                                                                                                 | 105,563 |
| S43 | TI ( ((self N3 (management or managing)) or adherence or compliance or coping or resilience) ) OR AB ( ((self N3 (management or managing)) or adherence or compliance or coping or resilience) )                                                                                                                                                                                                                                                                                                                                                                                                                             | 119,585 |

|     |                                                                                                                              |           |
|-----|------------------------------------------------------------------------------------------------------------------------------|-----------|
| S44 | TI ( (knowledge or information or education or experience) ) OR AB ( (knowledge or information or education or experience) ) | 805,869   |
| S45 | (MH "Knowledge+")                                                                                                            | 56,854    |
| S46 | (MH "Education+")                                                                                                            | 798,960   |
| S47 | TI ( need or needs ) OR AB ( need or needs )                                                                                 | 365,982   |
| S48 | S39 OR S40 OR S41 OR S42 OR S43 OR S44 OR S45 OR S46 OR S47                                                                  | 1,729,191 |
| S49 | S26 AND S38 AND S48                                                                                                          | 1,604     |
